1 *Staphylococcus aureus*  $\beta$ -toxin exerts anti-angiogenic effects by inhibiting re-endothelialization  
2 and neovessel formation

3

4 Phuong M. Tran<sup>1,2</sup>, Sharon S. Tang<sup>1</sup>, and Wilmara Salgado-Pabón<sup>1\*</sup>

5

6 <sup>1</sup>Department of Pathobiological Sciences, School of Veterinary Medicine, University of  
7 Wisconsin-Madison, Madison, WI, USA

8

9 <sup>2</sup>Department of Microbiology and Immunology, Roy J. and Lucille A Carver College of  
10 Medicine, University of Iowa, Iowa City, IA, USA

11

12 \*Correspondence: [wsalgado@wisc.edu](mailto:wsalgado@wisc.edu)

13

## 14 SUMMARY

15 *Staphylococcus aureus* is the causative agent of numerous severe human infections associated  
16 with significant morbidity and mortality worldwide. *S. aureus* often targets the vascular  
17 endothelium to interfere with proper host responses during invasive infections. In this study, we  
18 provide evidence that *S. aureus*  $\beta$ -toxin inhibits wound repair mechanisms in human endothelial  
19 cells by preventing cell proliferation and migration. These findings were confirmed in a rabbit  
20 aortic explant model where  $\beta$ -toxin impedes sprout formation. Decreased cell proliferation was  
21 accompanied by decreased production of the angiogenic proteins endothelin-1, IGFBP-3,  
22 thrombospondin-1, TIMP-1, and TIMP-4. Meanwhile, inhibited wound repair was marked by  
23 increased HGF secretion from endothelial cells, likely a marker of endothelial cell damage.  
24 Together, these findings establish a mechanistic role for  $\beta$ -toxin where it inhibits proper tissue  
25 repair processes that likely promote *S. aureus* infective niche.

26  
27 **KEYWORDS:** *Staphylococcus aureus*,  $\beta$ -toxin, sphingomyelinase, angiogenesis, endothelial  
28 cell, endocarditis, beta-toxin, beta-hemolysin

## 30 INTRODUCTION

31 *Staphylococcus aureus* is the causative agent of numerous diseases including skin and  
32 soft-tissue infections, bacteremia, toxic shock syndrome, pneumonia, and infective endocarditis  
33 (IE) (1). It is also the leading cause of health care-associated infections (2, 3). *S. aureus*  
34 facilitates these distinct infections by producing a plethora of secreted and cell-associated  
35 virulence factors that, together, enable the organism to bind to, colonize, or invade host cells and  
36 tissues, and promote immune system subversion (4–9). The cytolytic  $\beta$ -toxin is encoded by a

37 majority of *S. aureus* strains and is produced during infection by phage excision (10).  $\beta$ -toxin  
38 promotes skin and nasal colonization, modulates the immune response to infection, and increases  
39 the severity of life-threatening infections like necrotizing pneumonia and IE (10–15).  $\beta$ -toxin  
40 exhibits pathogenic properties as a function of its sphingomyelinase (SMase) activity (16, 17).  
41 SMases hydrolyze sphingomyelin, a structural molecule in eukaryotic membranes, into  
42 phosphocholine and ceramide. Ceramide can be further processed by host enzymes into  
43 ceramide-1-phosphate (C1P), sphingosine, and sphingosine-1-phosphate (S1P) (18). These  
44 bioactive sphingolipids are widely recognized as essential signaling molecules that regulate  
45 various cellular functions and pathological processes, including cell growth and survival,  
46 inflammation and immune cell trafficking, vascular integrity and dysfunction, and angiogenesis  
47 (19–24).

48         Angiogenesis, the development of new capillaries from preexisting blood vessels, allows  
49 remodeling of the vascular system (25). It requires the coordinated efforts of endothelium-  
50 associated cells (e.g. pericytes, fibroblasts, monocytes) to sustain vessel sprouting and for  
51 functional maturation and vessel stabilization. Under physiologic conditions, angiogenesis leads  
52 to organ growth and re-vascularization of damaged or ischemic tissues for wound healing, while  
53 aberrant angiogenesis disrupts these processes and can promote pathological states like  
54 malignancy, asthma, diabetes, cirrhosis, multiple sclerosis, and endometriosis (25–27). More  
55 recently, angiogenesis induced as a result of microbial infection has been shown to act as an  
56 innate immune mechanism to control and clear invading pathogens (28). Not surprisingly, some  
57 bacterial pathogens (e.g. *Bartonella* spp., *Mycobacterium tuberculosis* and *Pseudomonas*  
58 *aeruginosa*), viruses (e.g. hepatitis C virus and human papilloma virus), and pathogenic fungi

59 (e.g. *Candida albicans* and *Aspergillus fumigatus*) have also been found to co-opt angiogenic  
60 processes to promote disease development and/or persistence (28–31).

61 *S. aureus* necrotizing pneumonia and IE are prime examples of aggressive infections that  
62 present with tissue injury that distinctly lacks signs of healing (14, 32). *S. aureus* IE is  
63 characterized by non-healing vegetative lesions, tissue destruction at and around the heart valves,  
64 and systemic complications such as ischemic liver lesions or kidney injury (4, 5, 33). Studies  
65 have also shown that  $\beta$ -toxin modulates endothelial cell function. In murine pneumonia models,  
66  $\beta$ -toxin induces vascular leakage and neutrophilic inflammation (14). *In vitro*, it increases  
67 platelet aggregation and inhibits neutrophil transendothelial migration, processes important in  
68 development of IE (12, 15, 32, 34). Furthermore, in human aortic endothelial cells,  $\beta$ -toxin  
69 decreases expression of the chemokine IL-8 and upregulates expression of VCAM-1, both of  
70 which are important angiogenic molecules (12, 15, 35, 36). Altogether, these studies indicate that  
71 a central process may exist where  $\beta$ -toxin targets angiogenesis as a pathogenesis mechanism that  
72 enhances *S. aureus* infections.

73 Therefore, we investigated whether  $\beta$ -toxin modulates the endothelial cell angiogenic  
74 response as a possible mechanism for potentiating *S. aureus* infections. We provide evidence that  
75  $\beta$ -toxin specifically targets both human endothelial cell proliferation and cell migration in well-  
76 established *in vitro* models. These results are consistent with a dysregulated angiogenic response  
77 centered around inhibition of the production of proteins important for these processes. While  $\beta$ -  
78 toxin can affect the complexity of capillary-like structures formed *in vitro*, this effect is  
79 insufficient to explain  $\beta$ -toxin's anti-angiogenic properties. Conclusive evidence comes from *ex*  
80 *vivo* studies that demonstrate  $\beta$ -toxin prevents branching microvessel formation, highlighting its  
81 ability to interfere with tissue re-vascularization and vascular repair.

## 82 RESULTS

### 83 **$\beta$ -toxin targets the production of angiogenic proteins involved in proliferation and** 84 **migration.**

85 SMase activity results in the production of bioactive sphingolipids, recognized as  
86 signaling molecules that modulate angiogenesis (37, 38). Hence, we first sought to establish  
87 whether *S. aureus*  $\beta$ -toxin alters the secretion profile of angiogenesis-related proteins in  
88 immortalized human aortic endothelial cells (iHAECs). For this purpose, we used a human  
89 angiogenesis proteome array to profile 48 proteins in iHAEC supernatants from subconfluent  
90 monolayers treated for 24 h under proangiogenic (growth medium  $\pm$  VEGF), antiangiogenic (+  
91 axitinib), or toxin conditions. In complete medium (basal medium with growth supplements), the  
92 most highly detected proteins secreted by endothelial cells were serpin E1, endothelial growth  
93 factor (EGF), thrombospondin-1, and endothelin-1, which promote either matrix degradation,  
94 growth, or proliferation and migration (Fig. S1A). These were followed largely by proteins that  
95 promote endothelial cell proliferation and migration (artemin, insulin-like growth factor binding  
96 protein (IGFBP)-2, IGFBP-3, pentraxin 3), capillary formation (angiopoietin-2), and tissue  
97 inhibitor of metalloproteinases (TIMP)-1. Hence, as expected, iHAECs in growth medium are  
98 under angiogenic-inducing conditions. For the subsequent studies, the secretion profile of  
99 iHAECs treated with VEGF (10 ng mL<sup>-1</sup>), axitinib (30  $\mu$ M), or  $\beta$ -toxin (50 mg mL<sup>-1</sup>) were  
100 expressed as fold change from growth medium control, with a cut-off of  $\geq 1.5$ -fold or  $\leq 0.5$ -fold  
101 as thresholds for 50% increases or decreases in protein levels, respectively (39).

102 VEGF promotes angiogenesis and is produced by iHAECs during growth in a monolayer,  
103 albeit at low levels (Fig. S1A). Thus, VEGF treatment was used to maximally induce  
104 angiogenesis under experimental conditions tested in our study. VEGF-treated cells exhibited a

105 similar profile to that of growth medium control, with the exception of IL-8 which showed  
106 increased production (1.5-fold; +50%) (Fig. 1). Furthermore, in the presence of complete  
107 medium, VEGF did not further induce proliferation, confirming optimal proangiogenic  
108 conditions (Fig. S2A, S2B). Axitinib is an antiangiogenic molecule that inhibits VEGF receptor-  
109 1, -2, and -3 signaling in endothelial cells (40) and inhibits both cell proliferation and cell  
110 migration (41). At working concentrations, axitinib significantly inhibited metabolic activity and  
111 proliferation (Fig. S2C, S2D) while preserving integrity of the monolayer as visually established.  
112 Consistent with its antiangiogenic activity, axitinib induced an overall inhibitory profile with  
113 <0.5-fold decreases in production of granulocyte-macrophage colony-stimulating factor (GM-  
114 CSF), A Disintegrin and Metalloproteinase with Thrombospondin Motifs (ADAMTS)-1,  
115 Hepatocyte Growth Factor (HGF), pentraxin 3, TIMP-1, and dipeptidyl peptidase IV (DPPIV)  
116 (Fig. 1).  $\beta$ -toxin treatment at a sublethal concentration (Fig. S1B) resulted in an overall inhibitory  
117 profile that was centered around proteins important for cell proliferation and migration: IGFBP-3  
118 (0.4-fold; -64%), TIMP-1 (0.2-fold; -75%), TIMP-4 (0.5-fold; -50%), thrombospondin-1 (0.4-  
119 fold; -63%), and endothelin-1 (0.3-fold; -71%) (Fig.1). The protein profile resulting from  $\beta$ -toxin  
120 treatment suggests that  $\beta$ -toxin is an antiangiogenic molecule that inhibits angiogenesis by  
121 targeting proliferation and migration.

122

### 123 **$\beta$ -toxin inhibits wound healing.**

124 *As in vitro* wound healing assays are a function of proliferation and migration, we used  
125 this approach to directly evaluate the ability of iHAECs to close a gap in the monolayer in the  
126 presence or absence of  $\beta$ -toxin (50  $\mu\text{g mL}^{-1}$ ). VEGF (10  $\text{ng mL}^{-1}$ ) and axitinib (10  $\mu\text{M}$ ) were used  
127 as inducing or inhibition controls, respectively. Of note, axitinib, at the concentration used to

128 treat monolayers (30  $\mu$ M) resulted in generalized iHAEC toxicity during wound healing (as  
129 observed by loss of integrity of the monolayer) (Fig. S2B). Hence, we decreased the axitinib  
130 concentration to 10  $\mu$ M for this assay which inhibited proliferation but did not result in  
131 cytotoxicity (Fig. S3).

132 Without treatment, iHAECs closed 80% of the gap by 24 h, as measured in time-lapse  
133 analyses (Fig. 2). iHAECs stimulated with VEGF showed an increase in percent gap closure of  
134 15%, while those treated with axitinib displayed significant inhibition with a 28% decrease in  
135 gap closure compared to untreated cells (Fig. 2A and 2B). Similarly, iHAECs treated with  $\beta$ -  
136 toxin exhibited a 28.5% decrease in gap closure (Fig. 2A and 2C). During infection, host cells  
137 can undergo prolonged exposure to  $\beta$ -toxin before vascular damage occurs, potentiating the  
138 inhibitory phenotype. To assess this, iHAECs were treated overnight with  $\beta$ -toxin, prior to gap  
139 formation, and thereafter as previously performed. Pretreatment with  $\beta$ -toxin significantly  
140 inhibited gap closure by 34.3% (Fig. 2A and 2D), but overall provided no significant further  
141 inhibition (Fig. 2B and 2C). These results were confirmed in human umbilical vein endothelial  
142 cells (HUVECs), where similar inhibition of gap closure was observed upon exposure to  $\beta$ -toxin  
143 with and without pretreatment (Fig. S4). These data indicate that  $\beta$ -toxin markedly inhibits re-  
144 endothelialization, contributing to defects in vascular repair.

145

#### 146 **Differential protein production during wound healing.**

147 Because differential effects were observed in the wound healing assay in response to  $\beta$ -  
148 toxin and experimental controls, we investigated the proteome profile in media collected at the  
149 end of the assays. This provided an opportunity to establish whether distinct profiles would  
150 ensue from cell populations that contain cells actively migrating and proliferating to close a gap

151 versus those in a monolayer. In the wound healing assay, serpin E1, EGF, and endothelin-1  
152 remained unchanged compared to growth in a monolayer (Fig. S1A). Overall, these remained the  
153 most highly detected proteins secreted by iHAECs *in vitro*. Interestingly, compared to growth in  
154 a monolayer, iHAECs in the wound healing assay exhibited both increases and decreases in  
155 proteins involved in growth, proliferation, and migration, where placental growth factor (PIGF),  
156 TIMP-1, and thrombospondin-1 were increased by 1.6-fold (+57%), 2.1-fold (+108%), and 1.7-  
157 fold (+67%), respectively, while hepatocyte growth factor (HGF), and IGFBP-2 were decreased  
158 by 0.5-fold (-51%) and 0.4-fold (-57%), respectively (Fig. S1A).

159 iHAECs in the wound healing assay were more responsive to the effects of VEGF and  
160 axitinib. Cells treated with VEGF exhibited an induced angiogenesis profile compared to both  
161 untreated cells (Fig. 3) and VEGF-treated cells grown in a monolayer (Fig. S5). Proteins that  
162 showed increases during wound healing spanned most categories, with those important in  
163 extracellular matrix degradation being the sole exception (Fig. 3). These results are consistent  
164 with enhanced gap closure (Fig. 2A) and reiterate the prominent effects of VEGF on regulation  
165 of angiogenic factors. While axitinib significantly inhibited gap closure (Fig. 2A), it induced a  
166 mixed protein profile and a shift away from the inhibitory profile observed in iHAEC  
167 monolayers (Fig. S5). Instead, during wound healing, axitinib specifically targeted matrix  
168 metalloproteinase (MMP)-8 (0.5-fold; -47%), PDGF-AA (1.7-fold; +34%), and TIMP-4 (0.5-  
169 fold; -41%) (Fig. 3). Subtle decreases in a select group of proteins caught our attention as they  
170 stand opposite to the changes observed in VEGF-treated cells. These included the cytokines  
171 CXCL-16 and IL-1 $\beta$ , MMP-9, the growth factor HB-EGF, and proteins involved in regulating or  
172 aiding proliferation and migration (IGFBP-2, TIMP-1, activin A, serpin F1, and DPPIV).



173 Strikingly, iHAECs treated with  $\beta$ -toxin during wound healing exhibited a mostly neutral  
174 profile with subtle changes observed throughout. Most notably were decreased MMP-8  
175 (important in matrix remodeling for angiogenesis) and increased endostatin (an angiogenesis  
176 inhibitor) (Fig. 3). The most relevant change after  $\beta$ -toxin treatment was increased production of  
177 the growth factor HGF by 1.7-fold (+69%) (Fig. 3). This profile is intriguing given that in that  
178 same context  $\beta$ -toxin significantly inhibited gap closure (Fig. 2C). Pretreatment shifted the  
179 profile back to mostly inhibitory, where iHAECs exhibited large decreases in  
180 proliferation/migration proteins PD-ECGF (0.4-fold; -59%) and TIMP-1 (0.5-fold; -46%) (Fig.  
181 3). Therefore, subtle changes in the balance of angiogenic proteins may be sufficient to  
182 significantly impact wound healing as measured *in vitro*. Collectively, these results illustrate the  
183 context-dependent characteristics of the angiogenic profile of iHAECs in response to exogenous  
184 agents.

185

### 186 **$\beta$ -toxin inhibits cell migration and cell proliferation.**

187 Having established that  $\beta$ -toxin inhibits wound healing, we addressed whether this effect  
188 was the result of impaired cell migration, cell proliferation, or both. For this purpose, we  
189 conducted wound healing assays in the presence of mitomycin C, an antiproliferative agent.  
190 Mitomycin C was used at  $2 \mu\text{g mL}^{-1}$  as this concentration reduced metabolic activity by 49.2%,  
191 and in combination with  $\beta$ -toxin did not further decrease metabolic activity (Fig. 4A). Treatment  
192 with mitomycin C above  $2 \mu\text{g mL}^{-1}$  resulted in cell toxicity (data not shown). Mitomycin C  
193 inhibited wound healing by 17.8% compared to untreated cells, where the largest effect on cell  
194 proliferation and concomitant decreases in wound closure were measured past 15 h (Fig. 4B,  
195 4C). iHAECs concurrently treated with  $\beta$ -toxin ( $50 \mu\text{g mL}^{-1}$ ) and mitomycin C exhibited a 40.9%

196 decrease in wound closure compared to untreated cells and a 28.8% decrease compared to those  
197 treated only with mitomycin C (Fig. 4B and 4C). The additive effect of mitomycin C and  $\beta$ -toxin  
198 in the wound healing assay is consistent with  $\beta$ -toxin inhibiting cell migration.

199 In the wound healing assay, initially cells exist in a monolayer and gap closure is largely  
200 driven by actively migrating cells of the gap cell front. Therefore, we sought to directly test  $\beta$ -  
201 toxin effects on cell proliferation in a population of actively proliferating cells. For this, iHAECs  
202 were cultured at the time of seeding in the presence or absence of  $\beta$ -toxin or mitomycin C and  
203 total cell counts were measured from images taken at various time points over a 20-h period (Fig.  
204 4D). In this context,  $\beta$ -toxin significantly inhibited cell proliferation comparable to the inhibition  
205 induced by mitomycin C (Fig. 4D). These data provide evidence that  $\beta$ -toxin can interfere with  
206 the angiogenic process by both inhibiting cell migration and cell proliferation.

207

#### 208 **$\beta$ -toxin inhibits neovessel formation in rabbit aortic ring explants.**

209 Re-vascularization is the ultimate outcome of angiogenesis. *In vitro*, endothelial cell  
210 differentiation into capillaries or tubulogenesis can be addressed with a tube formation assay. For  
211 this assay, iHAECs and HUVECs were seeded on growth factor reduced (GFR)-Matrigel in  
212 medium containing serum to induce tube formation. Cells were treated with either  $\beta$ -toxin or  
213 axitinib (inhibitor control) at the time of seeding and the average tube length and loop count was  
214 measured over a 12-h time frame. Axitinib significantly decreased tube length and loop count  
215 over time (Fig. 5A-C). Yet,  $\beta$ -toxin treatment produced mixed results in aortic versus umbilical  
216 vein endothelial cells. In the presence of  $\beta$ -toxin, the average tube length and loop count  
217 remained unaffected in iHAECs (Fig. 5D, 5E). With HUVECs,  $\beta$ -toxin had no effect on tube  
218 length but did significantly decrease loop count, suggesting a direct effect on network

219 complexity during re-vascularization (Fig. 5F, 5G). The differential responses of HUVECs and  
220 iHAECs to  $\beta$ -toxin likely reflects either the heterogeneity of endothelial cells or the altered  
221 physiology of immortalized cells (42).

222 Hence, it remained to be established if  $\beta$ -toxin inhibits angiogenesis by targeting capillary  
223 formation. To address this in a more physiologically relevant system, we utilized the rabbit aortic  
224 ring model of angiogenesis. In this model, thoracic and abdominal aortas were explanted from  
225 New Zealand white rabbits, cut into ~1 mm sections, embedded into a thin layer of GFR-  
226 Matrigel, and cultured in complete medium to induce sprouting at the severed edge of the  
227 explant. We used equal numbers of thoracic and abdominal aortic rings per condition obtained  
228 from 3 individual rabbits. After embedding, aortic rings were cultured in the presence or absence  
229 of  $\beta$ -toxin or axitinib for 14 days. Untreated aortic ring explants (n=26) formed sprouts within a  
230 week that continued to grow in density and complexity over time while rings treated with  
231 axitinib (n=8) or  $\beta$ -toxin (n=12) failed to sprout over the course of the experiment (Fig. 6; Fig.  
232 S6; Fig. S7). Thus, in the more physiologically relevant context of the aortic ring model,  $\beta$ -toxin  
233 completely inhibited angiogenesis.

234

## 235 **DISCUSSION**

236 The vascular endothelium reaches into every organ, where endothelial cells, as building  
237 blocks of the vascular network, maintain cardiovascular homeostasis and health of surrounding  
238 tissue (43, 44). Angiogenesis, the process of developing neovessels from pre-existing formations,  
239 is a critical function of the endothelium and essential for vascular repair and tissue re-  
240 vascularization after injury. Hence, given the contribution of  $\beta$ -toxin to the exacerbation of *S.*  
241 *aureus* pneumonia (10, 14) and vegetative lesions during IE (10, 45, 46), we addressed whether

242  $\beta$ -toxin interferes with angiogenic processes. With the use of the *ex vivo* rabbit aortic ring model,  
243 which preserves the microenvironment of the aortic endothelium, we demonstrate that  $\beta$ -toxin is  
244 an anti-angiogenic virulence factor that prevents branching microvessel formation. We provide  
245 evidence that  $\beta$ -toxin specifically targets both human endothelial cell proliferation and cell  
246 migration as tested *in vitro*, which is consistent with an angiogenic response dysregulated in the  
247 production of proteins important in cell proliferation and cell migration. Furthermore, while  $\beta$ -  
248 toxin can affect the complexity of capillary-like structures formed *in vitro*, this effect is  
249 insufficient to explain  $\beta$ -toxin's anti-angiogenic properties. Yet, the different sensitivities of  
250 iHAECs and HUVECs to the effect of  $\beta$ -toxin in the tube formation assay suggest that  $\beta$ -toxin  
251 could induce increased pathology on tissues where endothelial cells are more sensitive to the  
252 toxin. These results highlight a mechanism where  $\beta$ -toxin exacerbates *S. aureus* invasive  
253 infections by interfering with tissue re-vascularization and vascular repair.

254         Ischemic or injured tissues release factors into the environment to trigger sprouting  
255 angiogenesis (47, 48). The balance between stimulatory (pro-angiogenic) and inhibitory (anti-  
256 angiogenic) factors controls the angiogenic switch, where endothelial cells change from a  
257 quiescent to a sprouting phenotype (49). When the local concentration of angiogenic inducers is  
258 produced in excess of the angiogenic inhibitors, neovessel formation is triggered. The angiogenic  
259 switch is off when the local concentration of angiogenic inhibitors overpowers the stimulators.  
260 Growth factors that promote angiogenesis include VEGF, HGF, serpin E1, EGF, bFGF,  
261 endothelin-1, and PDGF, while those that turn it off include thrombospondin-1 and endostatin  
262 (48, 50). Aberrant angiogenesis occurs when the system is inappropriately or chronically  
263 activated, or when there is a spatiotemporal imbalance of pro- and anti-angiogenic factors.  
264 Improper angiogenesis can lead to endothelial dysfunction, malignancy, insufficient wound

265 healing, and various diseases such as retinopathies, fibrosis, diabetes, cirrhosis, and  
266 endometriosis (25, 51–53).

267 *In vitro*, endothelial cell monolayers under pro-angiogenic conditions produce an  
268 angiogenesis proteome profile consistent with cells that are triggered to sprout. VEGF  
269 stimulation under this condition only further promotes angiogenesis by inducing the release of  
270 IL-8, confirming the pro-angiogenic state of endothelial cells.  $\beta$ -toxin shifted the overall profile,  
271 where the abundance of many proteins was decreased.  $\beta$ -toxin decreased the production of both  
272 endothelin-1 and thrombosponin-1. These two proteins are some of the most highly expressed in  
273 iHAECs in our experimental conditions and have opposing effects on angiogenesis. Endothelin-1  
274 is a potent endothelial cell mitogen shown to stimulate migration and to contribute to endothelial  
275 cell integrity, of particular importance in newly formed blood vessels (54). Thrombosponin-1 is a  
276 non-structural extracellular matrix protein and a potent endogenous inhibitor of cell adhesion,  
277 migration, and proliferation (55). Its primary function is to counter the effect of angiogenic  
278 stimuli, effectively turning the angiogenic switch off. Thrombosponin-1 decreases may  
279 potentially correspond to concomitant decreases of endothelin-1 and/or overall decreases of  
280 angiogenic signals.  $\beta$ -toxin also decreased the production of TIMP-1, TIMP-4, and IGFBP-3.  
281 TIMPs are known to control MMPs activities to maintain extracellular matrix homeostasis while  
282 promoting sprout formation, vessel stabilization, and vessel pruning (regression) (56). TIMPs  
283 also possess several cellular functions independent of their MMP-inhibiting activities (57). For  
284 example, TIMP-1 promotes cell growth and limits cell migration by controlling focal adhesions  
285 (58). TIMPs functions are spatiotemporally regulated, and dysregulation causes a functional  
286 imbalance leading to excessive and uncontrolled matrix degradation resulting in sprouting  
287 defects, vessel instability and/or vascular regression (56, 57). IGFBP-3 is yet another

288 multifunctional protein with context-dependent effects on angiogenesis. In HUVECs, IGFBP-3  
289 disrupts established focal adhesions and actin stress fibers inhibiting cell migration, while in  
290 endothelial progenitor cells, it stimulates cell proliferation, migration, and survival to promote  
291 vascular repair (59, 60). Therefore, the cell type dictates whether IGFBP-3 induces or inhibits  
292 cell migration. Altogether, these results indicate that  $\beta$ -toxin likely causes an imbalance in  
293 protein production that cumulatively disrupts angiogenesis in iHAECs.

294         The wound healing assay provided a context with which to address the effect of  $\beta$ -toxin  
295 on the endothelium's endogenous capacity to repair. It mimics re-endothelialization after  
296 vascular injury, a process dependent on cell migration and proliferation. iHAECs were sensitive  
297 to VEGF stimulation in this context, producing an array of growth factors known to promote  
298 angiogenesis (PDGF, FGF, and ANG-2), but in particular, factors that induce vessel maturation  
299 and capillary network formation (ANG-2 and GDNF) (61, 62). In this context, the IGFBPs and  
300 TIMP-1 are increased as well as coagulation factor III (also known as tissue factor) and several  
301 cytokines. The angiogenesis proteome profile is consistent with cells that are not only triggered  
302 to sprout but also ready for re-vascularization and tissue repair. During wound healing,  $\beta$ -toxin  
303 largely induced production of HGF, with subtle increases in PDGF-AA and endostatin, and a  
304 subtle decrease in MMP-8. Excess HGF in the serum is clinically used as an indicator of  
305 advanced atherosclerotic lesions, vascular lesions, and hypertension (63–65). Vascular lesions  
306 are accompanied by endothelial cell injury. As such, it has been suggested that endothelial cells  
307 produce HGF to promote repair of damaged endothelial cells at these lesions (63–65). Hence,  
308 iHAECs might induce HGF as a protective mechanism in response to endothelial injury caused  
309 by  $\beta$ -toxin. This response is consistent with increases in PDGF-AA, an early factor produced by  
310 senescent endothelial cells at cutaneous wound sites that promotes tissue repair (66). MMP-8 is

311 a pro-angiogenic factor rapidly induced during tissue injury that stimulates proliferation,  
312 migration, and capillary network formation (67). Therefore, the decrease in MMP-8 in  
313 combination with an increase in endostatin (angiogenic inhibitor), while subtle, may be relevant  
314 in the context of wound healing. Alternatively, the inhibitory effect of  $\beta$ -toxin in wound healing  
315 could be directly driven by sphingolipid metabolites produced from SMase activity.

316 The sphingolipid metabolites ceramide and S1P are critical regulators of cellular and  
317 pathological processes yet have opposing effects on vascular functions (23, 24, 37, 68).  
318 Ceramide is the first sphingolipid metabolite produced from  $\beta$ -toxin's hydrolysis of  
319 sphingomyelin. It promotes cellular functions associated with endothelial dysfunction and  
320 inhibition of angiogenesis. Ceramide is a well-known antiproliferative molecule and induces  
321 endothelial barrier dysfunction, oxidative stress, cell senescence, and cell death. It inhibits cell  
322 migration by disassembling focal adhesions and depolymerizing stress fibers (69). Ceramide can  
323 further be metabolized into S1P. S1P promotes cellular functions associated with maintenance of  
324 vascular integrity and induction of angiogenesis. It stimulates cell proliferation, supports barrier  
325 integrity, and promotes cell survival. S1P enhances cell contacts with the extracellular matrix to  
326 induce cell migration (70, 71). At the end, the cellular balance between ceramide and S1P  
327 dictates the outcomes. This balance is also known as the ceramide rheostat (24). Interestingly,  
328 several proteins regulated by  $\beta$ -toxin (IGFBP-3, TIMP-1, thrombospondin-1, HGF, endothelin-1)  
329 are either controlled by ceramide/S1P or regulate their activity. IGFBP-3 activates sphingosine  
330 kinase to convert sphingosine into S1P stimulating growth and promoting cell survival (72).  
331 Furthermore, IGFBP-3 directly inhibits sphingomyelinase (73). Meanwhile, ceramide has been  
332 shown to downregulate TIMP-1 in human glioma cells resulting in reduced tumor volume (74).  
333 Exogenous C2-ceramide causes apoptosis of porcine thyroid cells by decreasing

334 thrombospondin-1 expression (75). Conversely, S1P induces TIMP-1 production (76). HGF is  
335 protective against ceramide-mediated apoptosis (77) while endothelin-1 induces SMase activity  
336 resulting in increased VCAM-1 surface expression. The fate of ceramide following production  
337 by  $\beta$ -toxin is not known. Altogether, the anti-angiogenic effects of  $\beta$ -toxin described herein are  
338 consistent with ceramide rheostat signaling. Future studies will be directed at elucidating the  
339 underlying cellular processes driving the anti-angiogenic endothelial cell phenotype in the  
340 presence of  $\beta$ -toxin. In particular, the physiological context and sphingolipid metabolites that  
341 mediates those responses.

342         Angiogenesis is a highly complex but fundamental physiological process essential for  
343 vascular injury repair (i.e., due to mechanical damage or toxin-mediated damage of the  
344 endothelium) as well as the re-vascularization of ischemic or injured tissue (i.e., due to embolic  
345 events, trauma, or caused by pathogens and their toxins). Here, we provide evidence that *S.*  
346 *aureus*  $\beta$ -toxin inhibits capillary formation by a mechanism that targets cell proliferation and cell  
347 migration.  $\beta$ -toxin inhibition of IGFBP-3 and TIMP-1 are of particular interest as these  
348 molecules play crucial roles in endothelial cell proliferation and migration and are linked to  
349 SMase activity. While it is not clear how sphingolipid metabolites inhibit the abundance of  
350 IGFBP-3, decreases in IGFBP-3 favors ceramide accumulation as opposed to the more protective  
351 sphingolipid S1P (73). Ceramide not only arrests cell growth but also regulates production of  
352 TIMP-1 (19, 20, 74). During wound healing,  $\beta$ -toxin can also target MMP-8 to limit endothelial  
353 cell proliferation and migration, while turning angiogenesis off by increasing the levels of  
354 endostatin. In conclusion,  $\beta$ -toxin is an anti-angiogenic virulence factor that can prevent proper  
355 vascular repair, keeping the endothelium in a proinflammatory, hypercoagulable state, and



356 preventing neovessel formation. This environment in turn would allow *S. aureus* to maintain its  
357 infectious niche.

358

## 359 **ACKNOWLEDGEMENTS**

360 This work was supported by NIH grant 1R01AI134692-01A1 to W.S.-P.

361

## 362 **AUTHOR CONTRIBUTIONS**

363 Conceptualization, P.M.T and W.S.-P.; Methodology, P.M.T and W.S.-P.; Formal Analysis,  
364 P.M.T; Investigation, P.M.T and S.T.; Resources, W.S.-P.; Writing – original draft, P.M.T and  
365 W.S.-P.; Writing – review & editing, P.M.T, S.T., and W.S.-P.; Visualization, P.M.T.;  
366 Supervision, W.S.-P.; Funding Acquisition, W.S.-P.

367

## 368 **DECLARATION OF INTERESTS**

369 The authors declare no competing interests.

370

## 371 **MATERIALS AND METHODS**

### 372 **Protein Expression and Purification**

373 N-terminal His<sub>6</sub>-tagged  $\beta$ -toxin was previously cloned into *E. coli* TOP10 using a  
374 pTrcHis TOPO vector (45). The plasmid was maintained with 100  $\mu\text{g mL}^{-1}$  carbenicillin in all  
375 growths. Cells were grown in 1 L terrific broth (24 g yeast extract, 12 g tryptone, 4 mL glycerol,  
376 100 mL of supplement [0.17 M KH<sub>2</sub>PO<sub>4</sub>, 0.72 M K<sub>2</sub>HPO<sub>4</sub>]) at 37°C to an OD<sub>600</sub> 0.4 – 0.8  
377 followed by induction with 1 mM IPTG overnight at 30°C. Pelleted cells were resuspended in 25  
378 mL resuspension buffer (50 mM NaH<sub>2</sub>PO<sub>4</sub>, 500 mM NaCl, 20 mM imidazole, pH 8) and three

379 Pierce Protease Inhibitor Mini Tablets. 10 mL aliquots were divided into bead lysing tubes  
380 containing 7 g of 0.1 mm glass beads and homogenized using a PreCellys Cryolys Evolution  
381 (bertin Instruments) with the following settings: 9900 rpm, 6- 30 s cycles with 60 s rests, 4°C.  
382 Lysate was centrifuged (40 min, 50,000 x g, 4°C) and clarified with a 0.45 µm filter. Affinity  
383 chromatography with HisPur™ Cobalt Resin followed by an imidazole-gradient elution (50 mM  
384 NaH<sub>2</sub>PO<sub>4</sub>, 500 mM NaCl, 250 mM imidazole, pH 8) was used to separate β-toxin. Protein-  
385 containing fractions, assessed by SDS-PAGE, were dialyzed against 4 L PBS, pH 7.4, overnight  
386 at 4°C. Protein concentration was determined by Qubit™ using the Qubit™ Protein Broad Range  
387 kit. Typical yield was 4-5 mg per liter of growth. Purity was assessed by Coomassie stain of  
388 SDS-PAGE gels and was at least 95% by visual observation. All proteins were cleaned of  
389 endotoxin via Detoxi-Gel™ resin and endotoxin levels were assessed using the ToxinSensor™  
390 LAL Endotoxin Assay Kit. Proteins were used when the final endotoxin concentration in  
391 experiments was ≤0.025 ng mL<sup>-1</sup> (78).

392

### 393 **Culture Conditions**

394 Immortalized human aortic endothelial cells (iHAECs) are a recently established cell line  
395 shown to retain phenotypic and functional characteristics of primary cells, serving as a large-  
396 vessel model system in which to address questions relevant to vascular biology (78). Human  
397 umbilical vein endothelial cells (HUVECs) were obtained from Thermo Fisher as low passage  
398 cells.

399 Cells were grown at 37°C, 5% CO<sub>2</sub> in phenol red-free, endothelial cell basal medium  
400 (Medium 200) supplemented with low-serum growth supplement (LSGS, final concentrations of:  
401 FBS 2%, hydrocortisone 1µg mL<sup>-1</sup>, human epidermal growth factor 10 ng mL<sup>-1</sup>, basic fibroblast

402 growth factor, 3 ng mL<sup>-1</sup>, heparin 10 µg mL<sup>-1</sup>). Cells were maintained on 1% gelatin-coated  
403 plates unless otherwise stated. Cells were passaged at least twice before use in experiments.  
404 iHAECs were used at passages between 4 and 10 from a single clone. Primary HUVECs were  
405 used between 4 and 12 passages. Mycoplasma-testing was conducted every 6 months using  
406 MycoAlert™ Plus Mycoplasma Detection Kit.

407

### 408 **Cell Growth and Metabolic Activity**

409 An MTS assay was used to determine cell viability. Cells were seeded at 7,000 cells/well  
410 into gelatin-coated 96-well plates and grown overnight to near confluency. Media was removed  
411 and replaced with 100 µL of media containing increasing concentrations of β-toxin, VEGF,  
412 axitinib, or mitomycin C followed by overnight incubation. 20 µL of CellTiter 96® AQueous  
413 One Solution™ was added to each well followed by a 1 h incubation at 37°C, 5% CO<sub>2</sub>. A plate  
414 reader was used to read absorbance at 490 nm. Three independent experiments in triplicate were  
415 conducted. The data were normalized so that untreated cells were 100% activity.

416

### 417 **Proteome Profiler™ Human Angiogenesis array**

418 Gelatin-coated 96-well tissue culture plates were seeded at 7,000 cells/well and grown to  
419 near confluence. Fresh media containing β-toxin at 50 µg mL<sup>-1</sup> was added, and plates were  
420 incubated for 24 h at 37°C, 5% CO<sub>2</sub>. The conditioned media was removed and stored at -80°C  
421 until analyzed. Each treatment was conducted in triplicate with three technical replicates. The  
422 relative expression of 55 angiogenesis-related proteins was determined from the conditioned  
423 media of various experiments using a Proteome Profiler™ Human Angiogenesis Antibody Array  
424 according to the manufacturer's instructions modified for fluorescent analysis. 120 µL of

425 conditioned media was incubated with a cocktail of biotinylated detection antibodies for 1 h at  
426 room temperature. During this incubation, the membrane containing the capture antibodies was  
427 blocked at room temperature. After the hour incubation, the sample-antibody mixture was added  
428 to the washed membrane and incubated overnight at 4°C. After a series of washes, the membrane  
429 was incubated with IRDye 800CW Streptavidin (1:2000 dilution) for 30 min at room  
430 temperature in the dark. After a series of washes, the fluorescent signal was detected using an  
431 Azure c600 (Azure Biosystems; 120 µm resolution, auto intensity). The signal produced at each  
432 spot is proportional to the amount of analyte bound and the mean pixel intensity of the duplicate  
433 spots on the membrane was calculated and averaged using Image Studio Software (LI-COR).  
434 Fold-changes over untreated controls were calculated for each detected protein. All treatments  
435 were matched. After an extensive literature search and cross-referencing of the GTExPortal and  
436 Expression Atlas databases, seven analytes unlikely to be produced by endothelial cells were  
437 removed from final analysis (angiopoietin-1, angiostatin/plasminogen, EG-VEGF, FGF-4, leptin,  
438 platelet factor 4, serpin B5). None of these analytes were produced by iHAECs.

439

#### 440 **Wound Healing Assay**

441 4-chamber silicone inserts were placed into 12-well uncoated tissue culture treated plates.  
442 Each chamber was seeded with  $3.08 \times 10^4$  cells and plates were incubated at 37°C, 5% CO<sub>2</sub> for 4  
443 h. The media was removed and replaced media containing β-toxin (50 µg mL<sup>-1</sup>) and incubated  
444 overnight. The inserts were removed, and conditioned media was saved. The wells were washed  
445 with DPBS, and the conditioned media was returned to the wells with additional media  
446 containing effectors so that the final volume was 1.5 mL per well. Experiments were also  
447 conducted where β-toxin (50 µg mL<sup>-1</sup>), VEGF (10 ng mL<sup>-1</sup>), axitinib (10 µM), or mitomycin C (2

448  $\mu\text{g mL}^{-1}$ ) was added after insert removal. The plates were incubated overnight in a Leica DMI8  
449 equipped with a Tokai Hit stage-top incubator set to  $37^{\circ}\text{C}$ , 5%  $\text{CO}_2$ . Images were captured every  
450 30 min for 24 h using a HC PL FLUOTAR 4x/0.13 objective lens. Five independent experiments  
451 were conducted for each treatment condition. Images were automatically analyzed via ImageJ.  
452 The edges were found (*Process*  $\rightarrow$  *Find Edges*) and the image was smoothed 10 times (*Process*  
453  $\rightarrow$  *Smooth*). A MinError(I) threshold was then applied (*Image*  $\rightarrow$  *Adjust*  $\rightarrow$  *Auto Local*  
454 *Threshold: MinError (I)*) to automatically detect cells. The particle count was then quantified  
455 with a particle size of 1000-infinity (*Analyze*  $\rightarrow$  *Analyze Particles [size: 1,000 – infinity]*) (79).

456

#### 457 **Cell Proliferation Assay**

458 For cell proliferation assays, cells were seeded at 7,000 cells/well into gelatin-coated 96-  
459 well plates and immediately treated with either  $\beta$ -toxin ( $50 \mu\text{g mL}^{-1}$ ), VEGF ( $10 \text{ ng mL}^{-1}$ ),  
460 axitinib ( $10 \mu\text{M}$ ), or mitomycin C ( $2 \mu\text{g mL}^{-1}$ ). Plates were incubated overnight in a Leica DMI8  
461 equipped with a Tokai Hit stage-top incubator (Tokai Hit Co., Ltd.) set to  $37^{\circ}\text{C}$ , 5%  $\text{CO}_2$ .  
462 Merged images were captured every 30 min for 5 h, then every 5 h using a HC PL FLUOTAR  
463 4x/0.13 objective lens. Three independent experiments were conducted for each treatment  
464 condition. Cells were automatically counted using ImageJ by modifying the protocol outlined by  
465 Venter and Niesler (2019). Images were converted to grayscale and the edges found (*Process*  $\rightarrow$   
466 *Find Edges*). An Isodata threshold was then applied (*Image*  $\rightarrow$  *Adjust*  $\rightarrow$  *Auto Threshold:*  
467 *Isodata*) to automatically detect cells. The particle count was then quantified after determining  
468 the appropriate particle size to decrease background (*Analyze*  $\rightarrow$  *Analyze Particles [size: 0.003 –*  
469 *0.2]*).

470

## 471 **Tube Formation**

472 Wells in angiogenesis  $\mu$ -slides were coated with 10  $\mu$ L of GFR-Matrigel and allowed to  
473 polymerize for 1 h in a humidified chamber at 37°C, 5% CO<sub>2</sub>. Cells were seeded at 10,000  
474 cells/well in media containing  $\beta$ -toxin (50  $\mu$ g mL<sup>-1</sup>) or axitinib (30  $\mu$ M). The  $\mu$ -slides were  
475 incubated overnight in a Leica DMI8 equipped with a Tokai Hit stage-top incubator set to 37°C,  
476 5% CO<sub>2</sub>. Images were captured every hour for 12 h using a HC PL FLUOTAR 4x/0.13 objective  
477 lens. Images were analyzed via the ImageJ Angiogenesis Analyzer plugin (80). A minimum of  
478 six independent experiments with five technical replicates were conducted.

479

## 480 **Aortic Ring Explant**

481 Mixed-sex New Zealand white rabbits, 2-3 kg, were purchased from Charles River and  
482 maintained at Charmany Instructional Facility at the School of Veterinary Medicine (SVM) of  
483 the University of Wisconsin (UW)-Madison. All rabbits were individually caged and given  
484 access to food and water *ad libitum*. Rabbits were given a period of at least four days to  
485 acclimate and deemed generally healthy by a veterinarian before experimental procedures. All  
486 experimental procedures were conducted under a UW-Madison SVM IACUC-approved protocol  
487 (#V006222).

488 Aortic ring explants were conducted by modifying the thin-layer method (81). The  
489 thoracic and abdominal aortas were excised immediately after euthanasia. In a petri dish  
490 containing PBS, excess fascia and connective tissue were removed, then 1 – 1.5 mm<sup>2</sup> cross-  
491 sections were cut with a scalpel. 300  $\mu$ L phenol red-free GFR-Matrigel was added to wells in 24-  
492 well plates and rings immediately embedded. After 10 min polymerization at 37°C, 5% CO<sub>2</sub>, 500  
493  $\mu$ L supplemented Medium 200 was added and plates were incubated at 37°C, 5% CO<sub>2</sub> up to 14

494 days. Medium 200 contained LSGS, 100 U mL<sup>-1</sup> penicillin-streptomycin, 2.5 µg mL<sup>-1</sup>  
495 amphotericin B, and relevant treatments. Media (± treatments) was changed every 3-5 days.  
496 Merged images were captured every other day using the Leica DMI8 equipped with a Tokai Hit  
497 stage-top incubator set to 37°C, 5% CO<sub>2</sub> using a HC PL FLUOTAR 4x/0.13 objective lens.  
498 Growth was assessed using ImageJ (82). A total of three rabbits were used with a minimum of  
499 three rings per condition.

500

### 501 **Quantification and Statistical Analysis**

502 Statistical analyses were performed using GraphPad Prism software. For each  
503 experiment, the precision measures and number of technical and biological replicates are  
504 indicated in figure legends. The number of cells, number of measurements and timing of  
505 experiments can be found in the Method Details for each experimental setup. For the proteomics  
506 analysis, emphasis was placed on proteins with mean fold change outside of the 0.5-to-1.5-fold  
507 change previously described using this same array (39). Cell proliferation, tube formation, and  
508 wound healing were analyzed by two-way repeated measures ANOVA with  $\alpha = 0.05$ . For MTS  
509 assays unpaired two-tailed t-tests were conducted. Statistical significance was given as \*  $p <$   
510 0.0332, \*\*  $p < 0.0021$ , \*\*\*  $p < 0.002$ , \*\*\*\*  $p < 0.0001$ .

511

## Figure 1

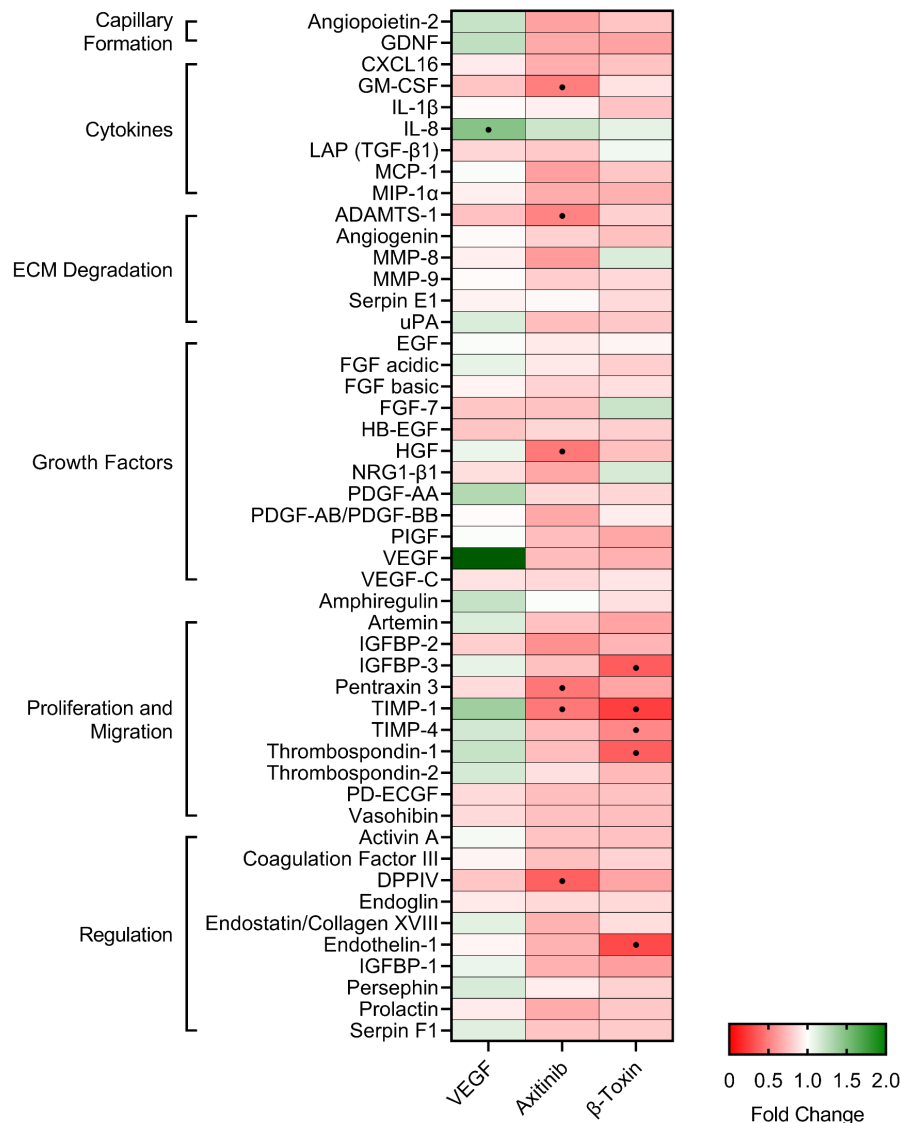

**Figure 1. β-toxin inhibits production of angiogenic proteins from human aortic endothelial cells in monolayer growth.**

Immortalized human aortic endothelial cells (iHAECs) grown to near confluency on gelatin-coated plates were treated with either VEGF (10 ng mL<sup>-1</sup>), axitinib (30 μM), or β-toxin (50 μg mL<sup>-1</sup>) for 24 h. Protein production was assessed by Proteome Profiler Human Angiogenesis Array Kit. Results are the mean fold change over untreated cells of three independent experiments conducted in duplicate. • angiogenic-related factors with a 50% increase (>1.5-fold change) or decrease (<0.5-fold change) from media control.



## Figure 2

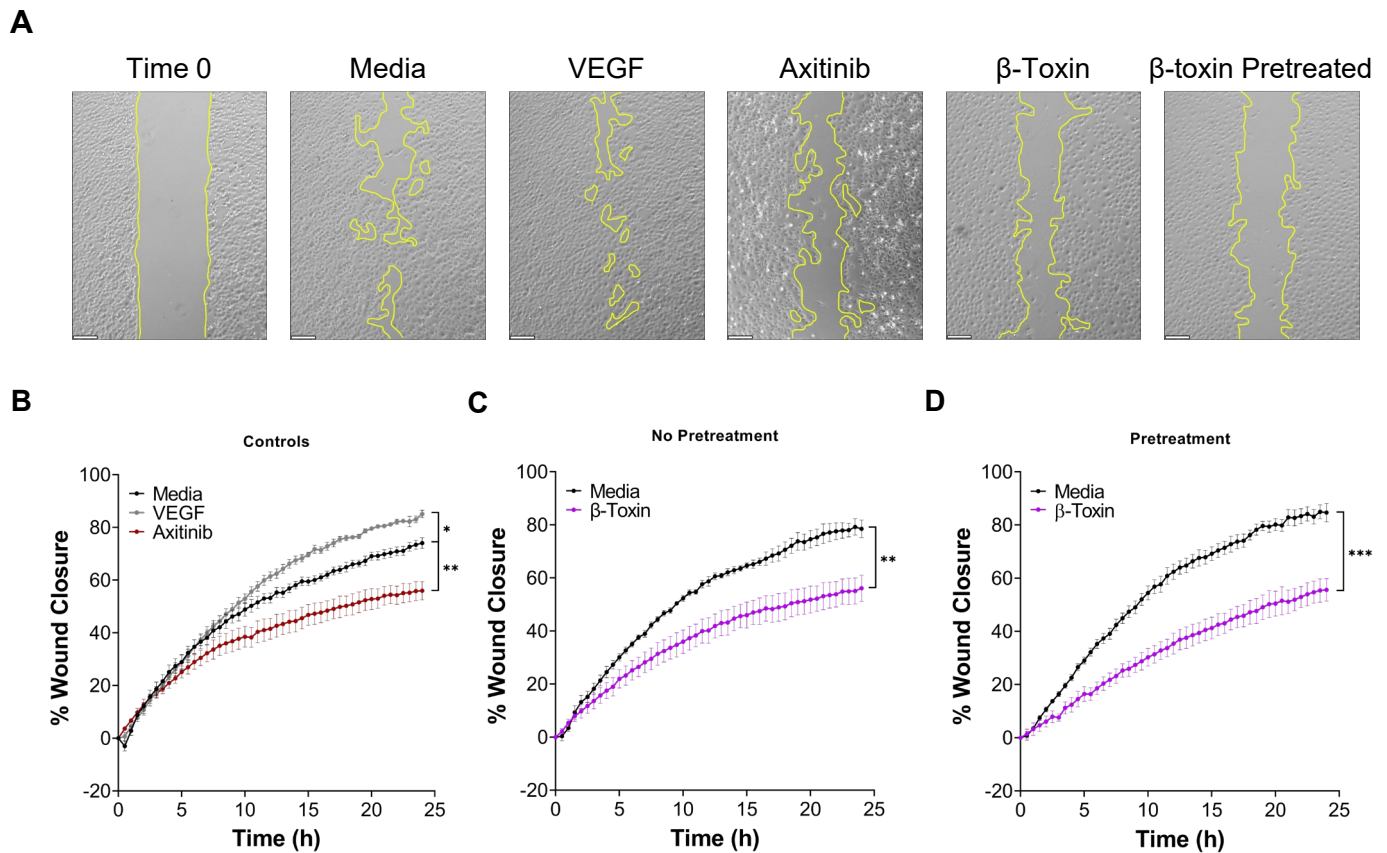

### Figure 2. $\beta$ -Toxin inhibits wound healing.

Time course analysis of iHAECs grown to confluency in silicone inserts that create uniform gaps upon removal and treated with either VEGF ( $10 \text{ ng mL}^{-1}$ ), axitinib ( $10 \text{ }\mu\text{M}$ ), or  $\beta$ -toxin ( $50 \text{ }\mu\text{g mL}^{-1}$ ) for 24 h. Images captured every 30 min.

(A) Phase-contrast microscopy at Time 0 (representative image) and at 24 h for all conditions tested. Scale bar =  $200 \text{ }\mu\text{m}$ .

(B) iHAECs treated with VEGF or axitinib.

(C) iHAECs treated with  $\beta$ -toxin.

(D) iHAECs pretreated overnight with  $\beta$ -toxin prior to gap formation and thereafter.

(B-D) All results are mean  $\pm$  SEM of five independent experiments with four replicates each. \*  $p < 0.0332$ , \*\*  $p < 0.0021$ , \*\*\*  $p < 0.002$ , \*\*\*\*  $p < 0.0001$ ; two-way repeated measures ANOVA with Tukey's multiple comparisons test.

## Figure 3

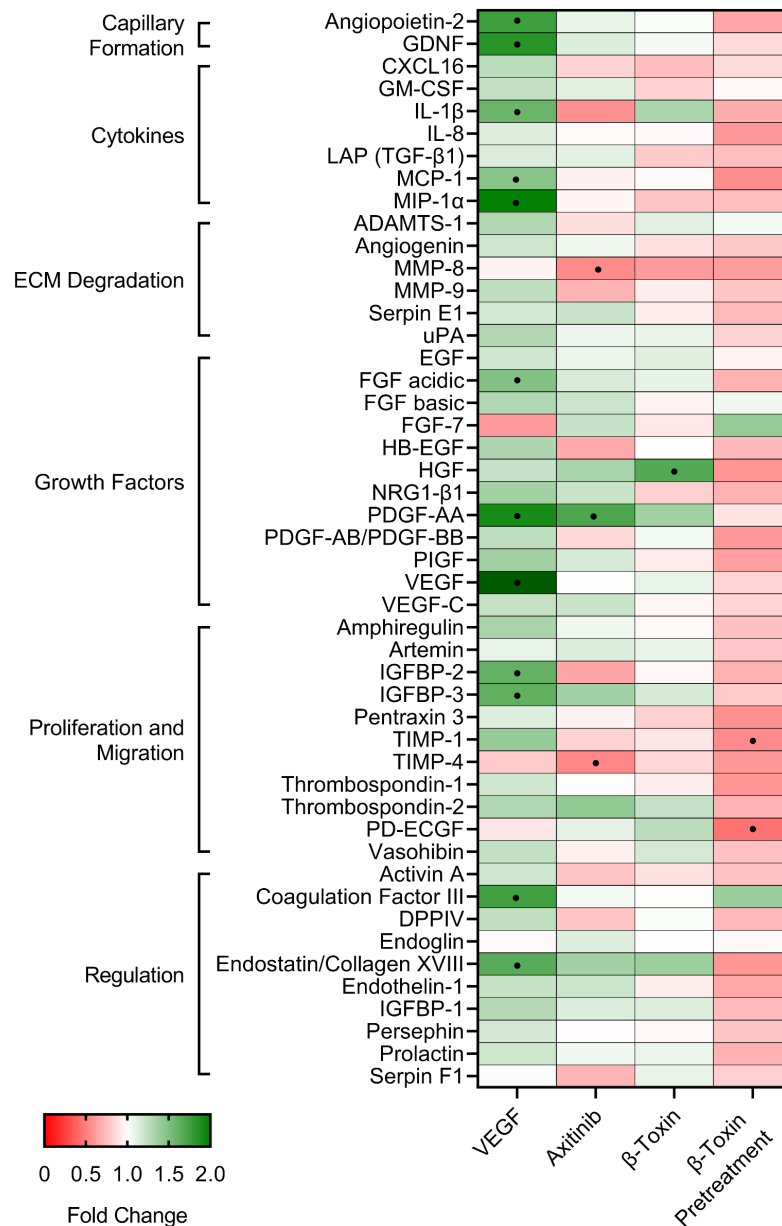

**Figure 3. β-Toxin modulates production of angiogenic proteins from iHAECs during wound healing.** iHAECs grown to confluency in silicone inserts that create uniform gaps upon removal and treated with either VEGF (10 ng mL<sup>-1</sup>), axitinib (10 μM), or β-toxin (50 μg mL<sup>-1</sup>) for 24 h. Angiogenesis proteome arrays were determined from culture supernatants collected at 24 h. Results shown are the mean fold change from untreated cells of five independent experiments.

- angiogenic-related factors with a 50% increase (>1.5-fold change) or decrease (<0.5-fold change) from media control.

## Figure 4

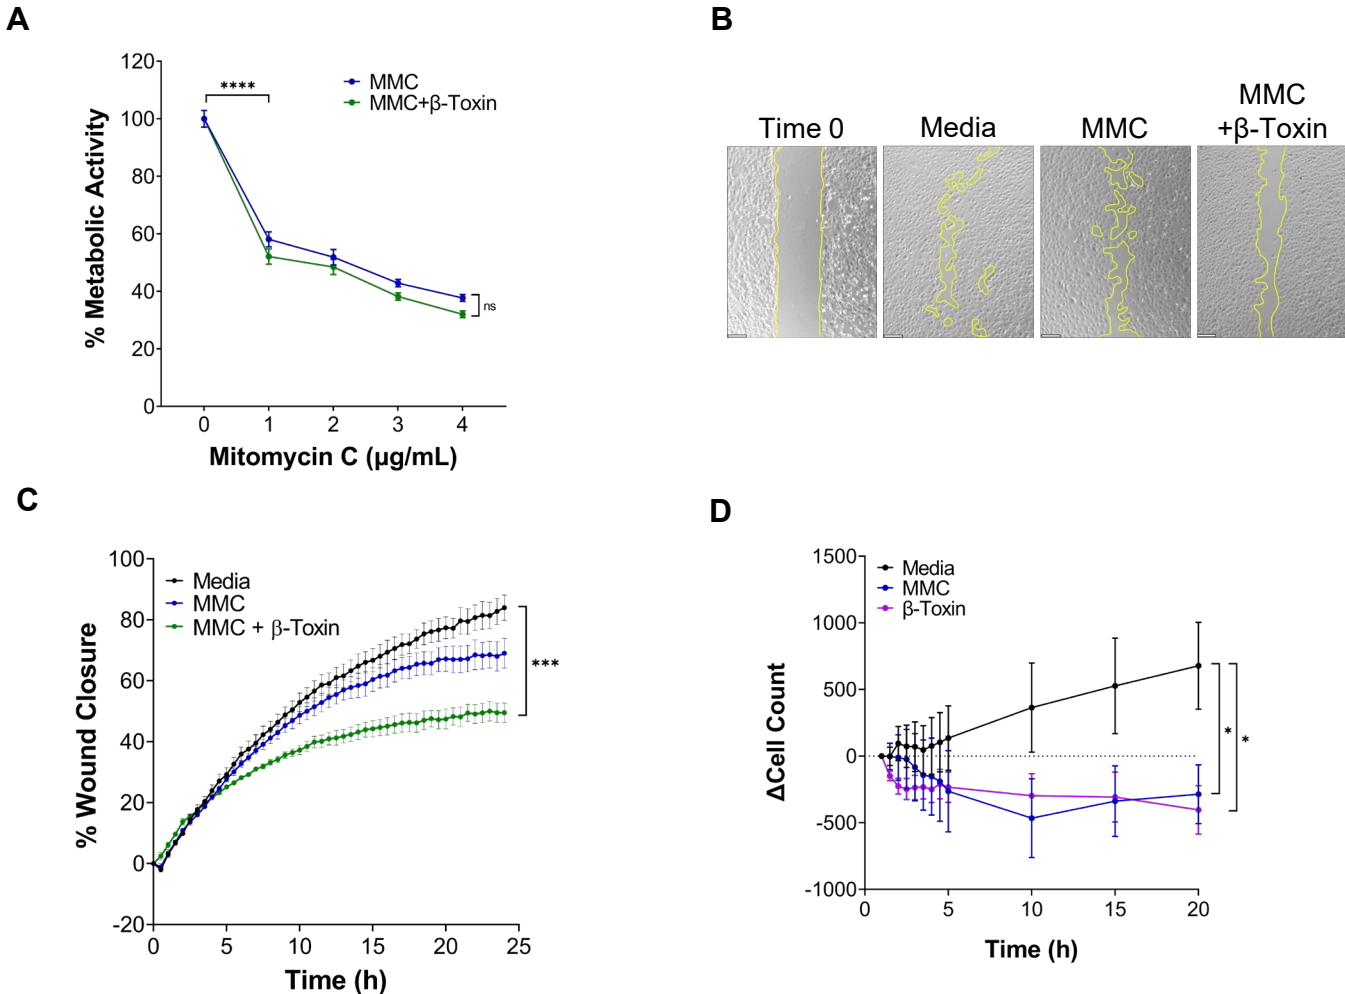

### Figure 4. $\beta$ -toxin inhibits migration and proliferation.

(A) Percent metabolic activity. iHAECs grown to near confluency on 1% gelatin-coated plates and treated for 24 h with mitomycin C (MMC) in the absence or presence of  $\beta$ -toxin ( $50 \mu\text{g mL}^{-1}$ ). \*\*\*\*  $p = <0.0001$ ; two-way repeated measures ANOVA. Unpaired, two-tailed t test was used to compare individual MMC treatments to media control ( $0 \mu\text{g mL}^{-1}$ ).

(B) Phase-contrast microscopy at Time 0 (representative image) and at 24 h for all conditions tested. Images captured every 30 min. Scale bar =  $200 \mu\text{m}$ .

(C) Percent wound closure over time of iHAECs treated with MMC ( $2 \mu\text{g mL}^{-1}$ )  $\pm$   $\beta$ -toxin ( $50 \mu\text{g mL}^{-1}$ ). All results are mean  $\pm$  SEM of five independent experiments with four replicates each. \*\*\*  $p < 0.002$ ; two-way repeated measures ANOVA.

(D) Cell proliferation of iHAECs seeded at 7,000 cells/well and treated with MMC ( $2 \mu\text{g mL}^{-1}$ ) or  $\beta$ -toxin ( $50 \mu\text{g mL}^{-1}$ ) over a 20-h period. Cells counted every 30 min for the first 5 h then every 5 h thereafter. Results represent the change in cell count (mean  $\pm$  SEM) of three independent experiments conducted in triplicate. \*  $p < 0.0332$ , unpaired, two-tailed t-test at 20 h.

## Figure 5

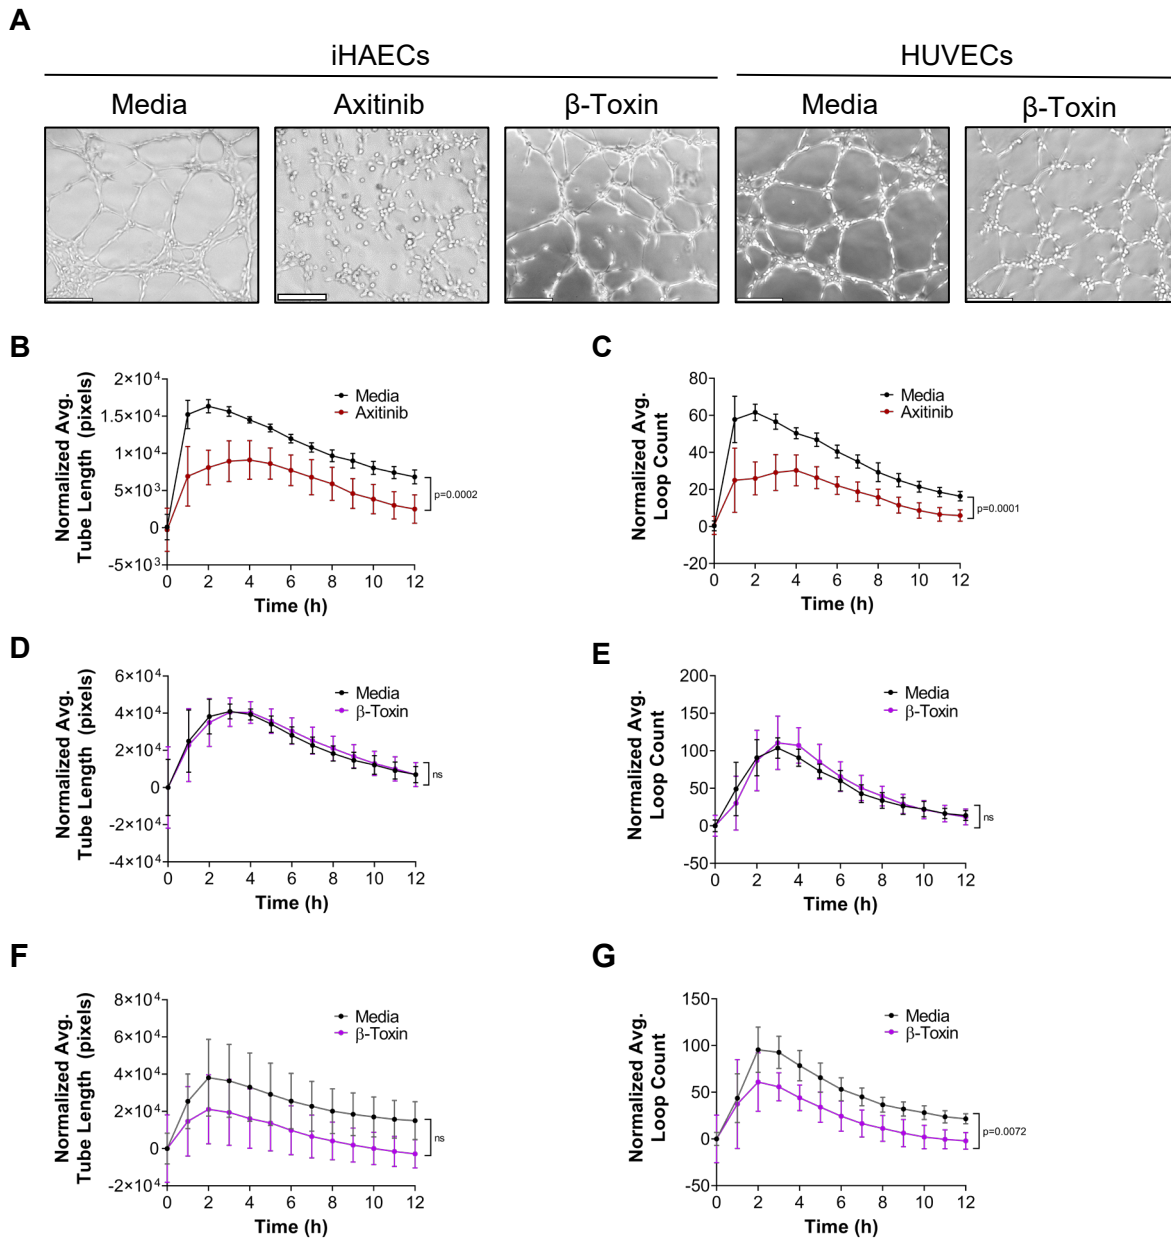

**Figure 5.  $\beta$ -Toxin has differential effects on tube formation.** iHAECs seeded on GFR-Matrigel were treated with either axitinib ( $30 \mu\text{M}$ ) or  $\beta$ -toxin ( $50 \mu\text{g mL}^{-1}$ ) and tube formation imaged every 1 h for 12 h. (A) Phase-contrast microscopy at 3 h. Scale bar =  $200 \mu\text{m}$ . (B) Average tube length over time of iHAECs  $\pm$  axitinib. (C) Average loop count over time of iHAECs  $\pm$  axitinib. (D) Average tube length over time of iHAECs  $\pm$   $\beta$ -toxin. (E) Average loop count over time of iHAECs  $\pm$   $\beta$ -toxin. (F) Average tube length over time of HUVECs  $\pm$   $\beta$ -toxin. (G) Average loop count over time of HUVECs  $\pm$   $\beta$ -toxin. (B-G) Results are means  $\pm$  SD for at least 6 independent experiments with five replicates each. Statistical significance determined by two-way repeated measures ANOVA.

## Figure 6

A

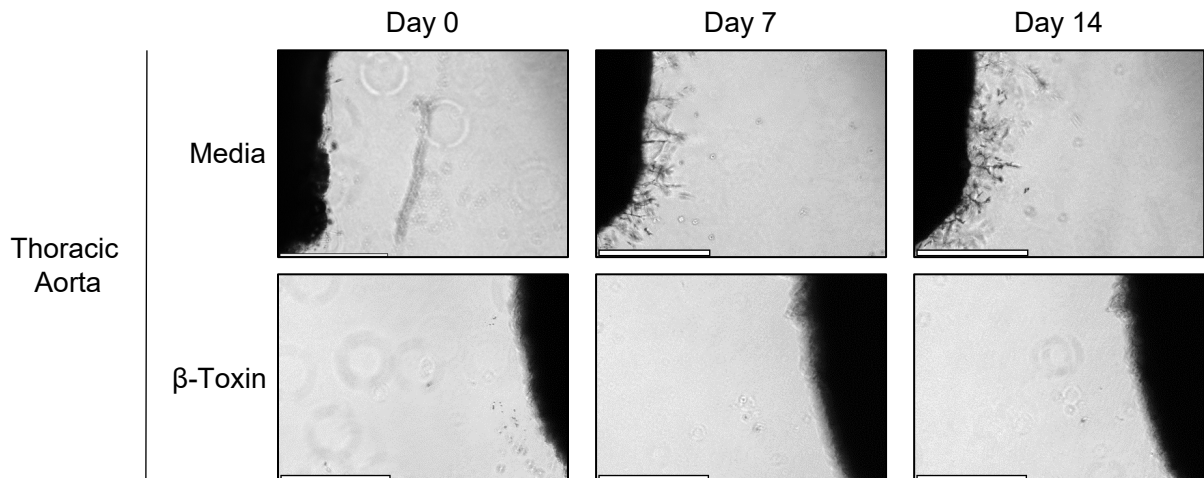

B

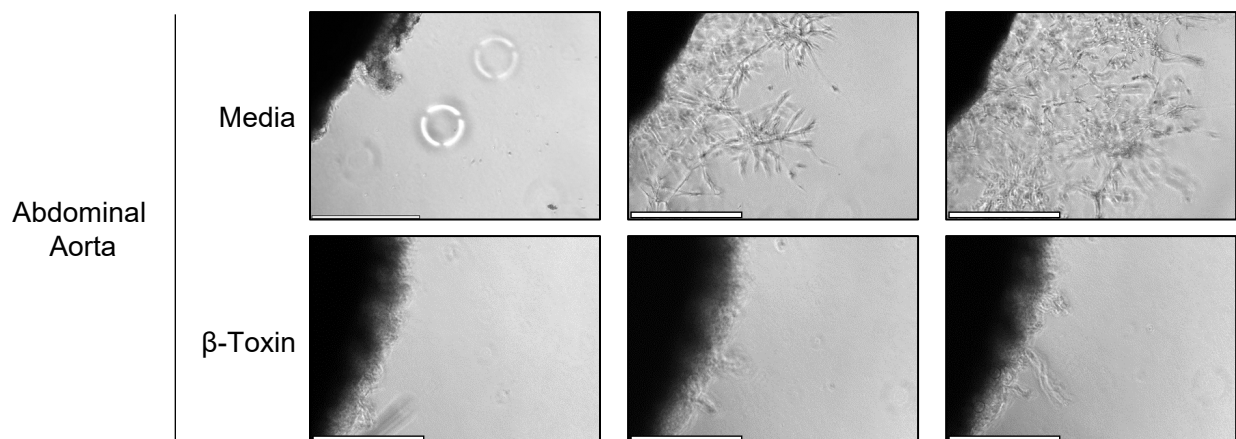

**Figure 6.  $\beta$ -toxin inhibits sprout formation.** Thoracic and abdominal aortas were collected and sectioned from 2–3 kg New Zealand white rabbits. Rings were cultured on GFR-Matrigel in the presence or absence of  $\beta$ -toxin ( $50 \mu\text{g mL}^{-1}$ ). Scale bar =  $500 \mu\text{m}$ .

(A) Phase-contrast microscopy of thoracic aortic rings.

(B) Phase-contrast microscopy of abdominal aortic rings.

## 583 REFERENCES

- 584 1. Salgado-Pabón W, Schlievert PM. 2014. Models matter: the search for an effective  
585 *Staphylococcus aureus* vaccine. Nat Rev Microbiol 12:585–591.
- 586 2. Wisplinghoff H, Bischoff T, Tallent SM, Seifert H, Wenzel RP, Edmond MB. 2003.  
587 Nosocomial bloodstream infections in US hospitals: Analysis of 24,179 cases from a  
588 prospective nationwide surveillance study. Clin Infect Dis 39:309–317.
- 589 3. Klein E, Smith DL, Laxminarayan R. 2007. Hospitalizations and deaths caused by  
590 methicillin-resistant *Staphylococcus aureus*, United States, 1999–2005. Emerg Infect Dis  
591 13:1840–1846.
- 592 4. King JM, Kulhankova K, Stach CS, Vu BG, Salgado-Pabón W. 2016. Phenotypes and  
593 virulence among *Staphylococcus aureus* USA100, USA200, USA300, USA400, and  
594 USA600 clonal lineages. mSphere 1:e00071-16.
- 595 5. Spaulding AR, Salgado-Pabón W, Kohler PL, Horswill AR, Leung DYM, Schlievert PM.  
596 2013. Staphylococcal and Streptococcal Superantigen Exotoxins. Clin Microbiol Rev  
597 26:422–447.
- 598 6. Dumont AL, Torres VJ. 2014. Cell Targeting by the *Staphylococcus aureus* Pore-Forming  
599 Toxins: It's Not Just About Lipids. Trends Microbiol 22:21–27.
- 600 7. Bien J, Sokolova O, Bozko P. 2011. Characterization of Virulence Factors of  
601 *Staphylococcus aureus*: Novel Function of Known Virulence Factors That Are Implicated  
602 in Activation of Airway Epithelial Proinflammatory Response. J Pathog 2011.
- 603 8. Oliveira D, Borges A, Simões M. 2018. *Staphylococcus aureus* Toxins and Their  
604 Molecular Activity in Infectious Diseases. Toxins (Basel) 10.
- 605 9. Brown AF, Leech JM, Rogers TR, McLoughlin RM. 2014. *Staphylococcus aureus*  
606 Colonization: Modulation of Host Immune Response and Impact on Human Vaccine  
607 Design. Front Immunol 4.
- 608 10. Salgado-Pabón W, Herrera A, Vu BG, Stach CS, Merriman JA, Spaulding AR, Schlievert  
609 PM. 2014. *Staphylococcus aureus*  $\beta$ -toxin production is common in strains with the  $\beta$ -  
610 toxin gene inactivated by bacteriophage. J Infect Dis 210:784–792.
- 611 11. Verkaik NJ, Benard M, Boelens HA, de Vogel CP, Nouwen JL, Verbrugh HA, Melles  
612 DC, van Belkum A, van Wamel WJB. 2010. Immune evasion cluster-positive  
613 bacteriophages are highly prevalent among human *Staphylococcus aureus* strains, but they  
614 are not essential in the first stages of nasal colonization. Clin Microbiol Infect 17:343–  
615 348.
- 616 12. Tajima A, Iwase T, Shinji H, Seki K, Mizunoe Y. 2009. Inhibition of endothelial  
617 interleukin-8 production and neutrophil transmigration by *Staphylococcus aureus* beta-  
618 hemolysin. Infect Immun 77:327–334.
- 619 13. Katayama Y, Baba T, Sekine M, Fukuda M, Hiramatsu K. 2013. Beta-Hemolysin  
620 Promotes Skin Colonization by *Staphylococcus aureus*. J Bacteriol 195:1194–1203.
- 621 14. Hayashida A, Bartlett AH, Foster TJ, Park PW. 2009. *Staphylococcus aureus* beta-toxin  
622 induces lung injury through syndecan-1. Am J Pathol 174:509–518.

- 623 15. Herrera A, Kulhankova K, Sonkar VK, Dayal S, Klingelhutz AJ, Salgado-Pabón W,  
624 Schlievert PM. 2017. Staphylococcal  $\beta$ -toxin modulates human aortic endothelial cell and  
625 platelet function through sphingomyelinase and biofilm ligase activities. *MBio* 8:e00273-  
626 17.
- 627 16. Doery HM, Magnusson BJ, Gulasekharan J, Pearson JE. 1965. The Properties of  
628 Phospholipase Enzymes in Staphylococcal Toxins. *J Gen Microbiol* 40:283–296.
- 629 17. Doery HM, Magnusson BJ, Cheyne IM, Gulasekharan J. 1963. A Phospholipase in  
630 Staphylococcal Toxin which Hydrolyses Sphingomyelin. *Nature* 198:1091–1092.
- 631 18. Chalfant CE, Spiegel S. 2005. Sphingosine-1-phosphate and ceramide 1-phosphate:  
632 Expanding roles in cell signaling. *J Cell Sci* 118:4605–4612.
- 633 19. Schenck M, Carpinteiro A, Grassmé H, Lang F, Gulbins E. 2007. Ceramide: Physiological  
634 and pathophysiological aspects. *Arch Biochem Biophys* 462:171–175.
- 635 20. Gulbins E, Pin LL. 2006. Physiological and pathophysiological aspects of ceramide. *Am J*  
636 *Physiol - Regul Integr Comp Physiol* 290:R11-26.
- 637 21. Woodcock J. 2006. Sphingosine and Ceramide Signalling in Apoptosis. *IUBMB Life*  
638 58:462–466.
- 639 22. Chatterjee S. 1998. Sphingolipids in atherosclerosis and vascular biology. *Arterioscler*  
640 *Thromb Vasc Biol* 18:1523–1533.
- 641 23. Hait NC, Maiti A. 2017. The Role of Sphingosine-1-Phosphate and Ceramide-1-  
642 Phosphate in Inflammation and Cancer. *Mediators Inflamm* 2017:4806541.
- 643 24. Cogolludo A, Villamor E, Perez-Vizcaino F, Moreno L. 2019. Ceramide and regulation of  
644 vascular tone. *Int J Mol Sci* 20.
- 645 25. Carmeliet P. 2005. Angiogenesis in life, disease and medicine. *Nature* 438:932–936.
- 646 26. Hsu T, Nguyen-Tran H-H, Trojanowska M. 2019. Active roles of dysfunctional vascular  
647 endothelium in fibrosis and cancer. *J Biomed Sci* 26.
- 648 27. Bluff JE, Brown NJ, Reed MW, Staton CA. 2008. Tissue factor, angiogenesis and tumour  
649 progression. *Breast Cancer Res* 10:204.
- 650 28. Rolando M, Buchrieser C. 2019. A Comprehensive Review on the Manipulation of the  
651 Sphingolipid Pathway by Pathogenic Bacteria. *Front Cell Dev Biol* 0:168.
- 652 29. Tsukamoto K, Shinzawa N, Kawai A, Suzuki M, Kidoya H, Takakura N, Yamaguchi H,  
653 Kameyama T, Inagaki H, Kurahashi H, Horiguchi Y, Doi Y. 2020. The *Bartonella*  
654 autotransporter BafA activates the host VEGF pathway to drive angiogenesis. *Nat*  
655 *Commun* 11.
- 656 30. Rogers MS, Christensen KA, Birsner AE, Short SM, Wigelsworth DJ, Collier RJ,  
657 D'Amato RJ. 2007. Mutant Anthrax Toxin B Moiety (Protective Antigen) Inhibits  
658 Angiogenesis and Tumor Growth. *Cancer Res* 67:9980–9985.
- 659 31. Vasil ML, Stonehouse MJ, Vasil AI, Wadsworth SJ, Goldfine H, Bolcome III RE, Chan J.  
660 2009. A Complex Extracellular Sphingomyelinase of *Pseudomonas aeruginosa* Inhibits  
661 Angiogenesis by Selective Cytotoxicity to Endothelial Cells. *PLoS Pathog* 5.

- 662 32. Liesman RM, Pritt BS, Maleszewski JJ, Patel R. 2017. Laboratory diagnosis of infective  
663 endocarditis. *J Clin Microbiol* 55:2599–2608.
- 664 33. Kinney KJ, Tran PM, Gibson-Corley KN, Forsythe AN, Kulhankova K, Salgado-Pabón  
665 W. 2019. Staphylococcal Enterotoxin C promotes *Staphylococcus aureus* Infective  
666 Endocarditis Independent of Superantigen Activity. *bioRxiv*  
667 doi.org/10.1101/2019.12.13.875633.
- 668 34. Chen Y, Ye LJ, Wu Y, Shen BZ, Zhang F, Qu Q, Qu J. 2020. Neutrophil-lymphocyte ratio  
669 in predicting infective endocarditis: A case-control retrospective study. *Mediators*  
670 *Inflamm* 2020.
- 671 35. Kong D-H, Kim YK, Kim MR, Jang JH, Lee S. 2018. Emerging Roles of Vascular Cell  
672 Adhesion Molecule-1 (VCAM-1) in Immunological Disorders and Cancer. *Int J Mol Sci*  
673 19.
- 674 36. Heidemann J, Ogawa H, Dwinell MB, Rafiee P, Maaser C, Gockel HR, Otterson MF, Ota  
675 DM, Luger N, Domschke W, Binion DG. 2003. Angiogenic effects of interleukin 8  
676 (CXCL8) in human intestinal microvascular endothelial cells are mediated by CXCR2. *J*  
677 *Biol Chem* 278:8508–8515.
- 678 37. Van Brocklyn JR, Williams JB. 2012. The control of the balance between ceramide and  
679 sphingosine-1-phosphate by sphingosine kinase: Oxidative stress and the seesaw of cell  
680 survival and death. *Comp Biochem Physiol Part B* 163:26–36.
- 681 38. Mehra VC, Jackson E, Zhang XM, Jiang X-C, Dobrucki LW, Yu J, Bernatchez P, Sinusas  
682 AJ, Shulman GI, Sessa WC, Yarovinsky TO, Bender JR. 2014. Ceramide-activated  
683 phosphatase mediates fatty acid-induced endothelial VEGF resistance and impaired  
684 angiogenesis. *Am J Pathol* 184:1562–1576.
- 685 39. Barron GA, Goua M, Wahle KWJ, Bermano G. 2017. Circulating levels of angiogenesis-  
686 related growth factors in breast cancer: A study to profile proteins responsible for tubule  
687 formation. *Oncol Rep* 38:1886–1894.
- 688 40. Kelly RJ, Rixe O. 2009. Axitinib—a selective inhibitor of the vascular endothelial growth  
689 factor (VEGF) receptor. *Target Oncol* 4:297–305.
- 690 41. Siedlecki J, Wertheimer C, Wolf A, Liegl R, Priglinger C, Priglinger S, Eibl-Lindner K.  
691 2017. Combined VEGF and PDGF inhibition for neovascular AMD: anti-angiogenic  
692 properties of axitinib on human endothelial cells and pericytes in vitro. *Graefe’s Arch Clin*  
693 *Exp Ophthalmol* 255:963–972.
- 694 42. Ribatti D, Nico B, Vacca A, Roncali L, Dammacco F. 2002. Endothelial cell  
695 heterogeneity and organ specificity. *J Hematother Stem Cell Res* 11:81–90.
- 696 43. Rajendran P, Rengarajan T, Thangavel J, Nishigaki Y, Sakthisekaran D, Sethi G,  
697 Nishigaki I. 2013. The Vascular Endothelium and Human Diseases. *Int J Biol Sci* 9:1057.
- 698 44. Félétou M. 2011. Multiple Functions of the Endothelial Cells The Endothelium: Part 1:  
699 Multiple Functions of the Endothelial Cells—Focus on Endothelium-Derived Vasoactive  
700 Mediators. Morgan & Claypool Life Sciences, San Rafael.
- 701 45. Herrera A, Vu BG, Stach CS, Merriman JA, Horswill AR, Salgado-Pabón W, Schlievert  
702 PM. 2016. *Staphylococcus aureus*  $\beta$ -Toxin mutants are defective in biofilm ligase and



- 703 sphingomyelinase activity, and causation of infective endocarditis and sepsis.  
704 *Biochemistry* 55:2510–2517.
- 705 46. Huseby MJ, Kruse AC, Digre J, Kohler PL, Vocke JA, Mann EE, Bayles KW, Bohach  
706 GA, Schlievert PM, Ohlendorf DH, Earhart CA. 2010. Beta toxin catalyzes formation of  
707 nucleoprotein matrix in staphylococcal biofilms. *Proc Natl Acad Sci* 107:14407–14412.
- 708 47. Adair TH, Montani J-P. 2010. Overview of Angiogenesis. *Angiogenesis*. Morgan &  
709 Claypool Life Sciences, San Rafael.
- 710 48. Moccia F, Negri S, Shekha M, Faris P, Guerra G. 2019. Endothelial Ca<sup>2+</sup> Signaling,  
711 Angiogenesis and Vasculogenesis: Just What It Takes to Make a Blood Vessel. *Int J Mol*  
712 *Sci* 20.
- 713 49. Baeriswyl V, Christofori G. 2009. The angiogenic switch in carcinogenesis. *Semin Cancer*  
714 *Biol* 19:329–337.
- 715 50. Bussolino F, Di Renzo MF, Ziche M, Bocchietto E, Olivero M, Naldini L, Gaudino G,  
716 Tamagnone L, Coffe A, Comoglio PM. 1992. Hepatocyte growth factor is a potent  
717 angiogenic factor which stimulates endothelial cell motility and growth. *J Cell Biol*  
718 119:629–641.
- 719 51. Johnson DE, O’Keefe RA, Grandis JR. 2018. Targeting the IL-6/JAK/STAT3 signalling  
720 axis in cancer. *Nat Rev Clin Oncol* 15:234–248.
- 721 52. Iredale JP, Pellicoro A, Fallowfield JA. 2017. Liver Fibrosis: Understanding the  
722 Dynamics of Bidirectional Wound Repair to Inform the Design of Markers and Therapies.  
723 *Dig Dis* 35:310–313.
- 724 53. Karska-Basta I, Pocij-Marciak W, Chrzyszcz M, Kubicka-Trzaska A, Dębicka-Kumela  
725 M, Gawęcki M, Romanowska-Dixon B, Sanak M. 2021. Imbalance in the Levels of  
726 Angiogenic Factors in Patients with Acute and Chronic Central Serous Chorioretinopathy.  
727 *J Clin Med* 10:1–15.
- 728 54. Dong F, Zhang X, Wold LE, Ren Q, Zhang Z, Ren J. 2005. Endothelin-1 enhances  
729 oxidative stress, cell proliferation and reduces apoptosis in human umbilical vein  
730 endothelial cells: role of ETB receptor, NADPH oxidase and caveolin-1. *Br J Pharmacol*  
731 145:323–333.
- 732 55. Lawler J. 2002. Thrombospondin-1 as an endogenous inhibitor of angiogenesis and tumor  
733 growth. *J Cell Mol Med* 6.
- 734 56. Cabral-Pacheco GA, Garza-Veloz I, la Rosa CC-D, Ramirez-Acuña JM, Perez-Romero  
735 BA, Guerrero-Rodriguez JF, Martinez-Avila N, Martinez-Fierro ML. 2020. The Roles of  
736 Matrix Metalloproteinases and Their Inhibitors in Human Diseases. *Int J Mol Sci* 21:9739.
- 737 57. Grünwald B, Schoeps B, Krüger A. 2019. Recognizing the Molecular Multifunctionality  
738 and Interactome of TIMP-1. *Trends Cell Biol* 29:6–19.
- 739 58. Akahane T, Akahane M, Shah A, Connor CM, Thorgeirsson UP. 2004. TIMP-1 inhibits  
740 microvascular endothelial cell migration by MMP-dependent and MMP-independent  
741 mechanisms. *Exp Cell Res* 301:158–167.
- 742 59. Kim J-H, Choi DS, Lee O-H, Oh S-H, Lippman SM, Lee H-Y. 2011. Antiangiogenic

- 743 antitumor activities of IGFBP-3 are mediated by IGF-independent suppression of Erk1/2  
744 activation and Egr-1-mediated transcriptional events. *Blood* 118:2622–2631.
- 745 60. Lee H-J, Lee J-S, Hwang SJ, Lee H-Y. 2015. Insulin-like growth factor binding protein-3  
746 inhibits cell adhesion via suppression of integrin  $\beta$ 4 expression. *Oncotarget* 6:15163.
- 747 61. Akwii RG, Sajib MS, Zahra FT, Mikelis CM. 2019. Role of Angiopoietin-2 in Vascular  
748 Physiology and Pathophysiology. *Cells* 8:471.
- 749 62. Zhong Z, Gu H, Peng J, Wang W, Johnstone BH, March KL, Farlow MR, Du Y. 2016.  
750 GDNF secreted from adipose-derived stem cells stimulates VEGF-independent  
751 angiogenesis. *Oncotarget* 7:36829–36841.
- 752 63. Nishimura M, Ushiyama M, Ohtsuka K, Nishida M, Inoue N, Matsumuro A, Mineo T,  
753 Yoshimura M. 1999. Serum Hepatocyte Growth Factor as a Possible Indicator of Vascular  
754 Lesions. *J Clin Endocrinol Metab* 84:2475–2480.
- 755 64. Javadi J, Heidari-Hamedani G, Schmalzl A, Szatmári T, Metintas M, Aspenström P,  
756 Hjerpe A, Dobra K. 2021. Syndecan-1 Overexpressing Mesothelioma Cells Inhibit  
757 Proliferation, Wound Healing, and Tube Formation of Endothelial Cells. *Cancers (Basel)*  
758 13.
- 759 65. Nakamura Y, Morishita R, Nakamura S, Aoki M, Moriguchi A, Matsumoto K, Nakamura  
760 T, Higaki J, Ogihara T. 1996. A Vascular Modulator, Hepatocyte Growth Factor, Is  
761 Associated With Systolic Pressure. *Hypertension* 28:409–413.
- 762 66. Demaria M, Ohtani N, Youssef SA, Rodier F, Toussaint W, Mitchell JR, Laberge R-M,  
763 Vijg J, Van Steeg H, Dollé MET, Hoeijmakers JHJ, de Bruin A, Hara E, Campisi J. 2014.  
764 An essential role for senescent cells in optimal wound healing through secretion of PDGF-  
765 AA. *Dev Cell* 31:722–733.
- 766 67. Fang C, Wen G, Zhang L, Lin L, Moore A, Wu S, Ye S, Xiao Q. 2013. An important role  
767 of matrix metalloproteinase-8 in angiogenesis in vitro and in vivo. *Cardiovasc Res*  
768 99:146–155.
- 769 68. Shea BS, Tager AM. 2012. Sphingolipid Regulation of Tissue Fibrosis. *Open Rheumatol J*  
770 6:123–129.
- 771 69. Presa N, Gomez-Larrauri A, Dominguez-Herrera A, Trueba M, Gomez-Muñoz A. 2020.  
772 Novel signaling aspects of ceramide 1-phosphate. *BBA - Mol Cell Biol Lipids*  
773 1865:158630.
- 774 70. Maceyka M, Spiegel S. 2014. Sphingolipid metabolites in inflammatory disease. *Nature*  
775 510:58–67.
- 776 71. Espaillet MP, Shamseddine AA, Adada MM, Hannun YA, Obeid LM. 2015. Ceramide  
777 and sphingosine-1-phosphate in cancer, two faces of the sphinx. *Transl Cancer Res* 4.
- 778 72. Granata R, Trovato L, Garbarino G, Taliano M, Ponti R, Sala G, Ghidoni R, Ghigo E.  
779 2004. Dual effects of IGFBP-3 on endothelial cell apoptosis and survival: Involvement of  
780 the sphingolipid signaling pathways. *FASEB J* 18:1456–1458.
- 781 73. Varma Shrivastav S, Bhardwaj A, Pathak KA, Shrivastav A. 2020. Insulin-Like Growth  
782 Factor Binding Protein-3 (IGFBP-3): Unraveling the Role in Mediating IGF-Independent

- 783 Effects Within the Cell. *Front Cell Dev Biol* 8:286.
- 784 74. Blázquez C, Carracedo A, Salazar M, Lorente M, Egia A, González-Feria L, Haro A,  
785 Velasco G, Guzmán M. 2008. Down-regulation of tissue inhibitor of metalloproteinases-1  
786 in gliomas: a new marker of cannabinoid antitumoral activity? *Neuropharmacology*  
787 54:235–243.
- 788 75. Rath GM, Schneider C, Dedieu S, Sartelet H, Morjani H, Martiny L, El Btaouri H. 2006.  
789 Thrombospondin-1 C-terminal-derived peptide protects thyroid cells from ceramide-  
790 induced apoptosis through the adenylyl cyclase pathway. *Int J Biochem Cell Biol*  
791 38:2219–2228.
- 792 76. Yamanaka M, Shegogue D, Pei H, Bu S, Bielawska A, Bielawski J, Pettus B, Hannun YA,  
793 Obeid L, Trojanowska M. 2004. Sphingosine kinase 1 (SPHK1) is induced by  
794 transforming growth factor- $\beta$  and mediates TIMP-1 up-regulation. *J Biol Chem*  
795 279:53994–54001.
- 796 77. Kannan R, Jin M, Gamulescu M-A, Hinton DR. 2004. Ceramide-induced apoptosis: role  
797 of catalase and hepatocyte growth factor. *Free Radic Biol Med* 37:166–175.
- 798 78. Kulhankova K, Kinney KJ, Stach JM, Gourronc FA, Grumbach IM, Klingelhutz AJ,  
799 Salgado-Pabón W. 2018. The superantigen toxic shock syndrome toxin 1 alters human  
800 aortic endothelial cell function. *Infect Immun* 86:e00848-17.
- 801 79. Venter C, Niesler C. 2019. Rapid quantification of cellular proliferation and migration  
802 using ImageJ. *Biotechniques* 66:99–102.
- 803 80. Carpentier G. 2012. ImageJ Contribution: Angiogenesis Analyzer. *ImageJ News* 5.
- 804 81. Zhu W-H, Nicosia RF. 2002. The thin prep rat aortic ring assay: A modified method for  
805 the characterization of angiogenesis in whole mounts. *Angiogenesis* 5:81–86.
- 806 82. Stiffey-Wilusz J, Boice JA, Ronan J, Fletcher AM, Anderson MS. 2001. An *ex vivo*  
807 angiogenesis assay utilizing commercial porcine carotidartery: Modification of the rat  
808 aortic ring assay. *Angiogenesis* 4:3–9.
- 809
